# Supplementary material for: Association Between Urinary Markers of Nucleic Acid Oxidation and Mortality in Type 2 Diabetes
Source: Oxford University Press journal article supplement (doi:10.2337/dc12-0998), 2012-11-14
Supplement: dc120998supplementarydata.pdf [file dc120998supplementarydata.pdf]

## SUPPLEMENTARY DATA

**Supplementary Figure 1.** Unadjusted Kaplan-Meier curves showing overall survival according to quartiles of 8-oxodG and 8-oxoGuo, respectively.

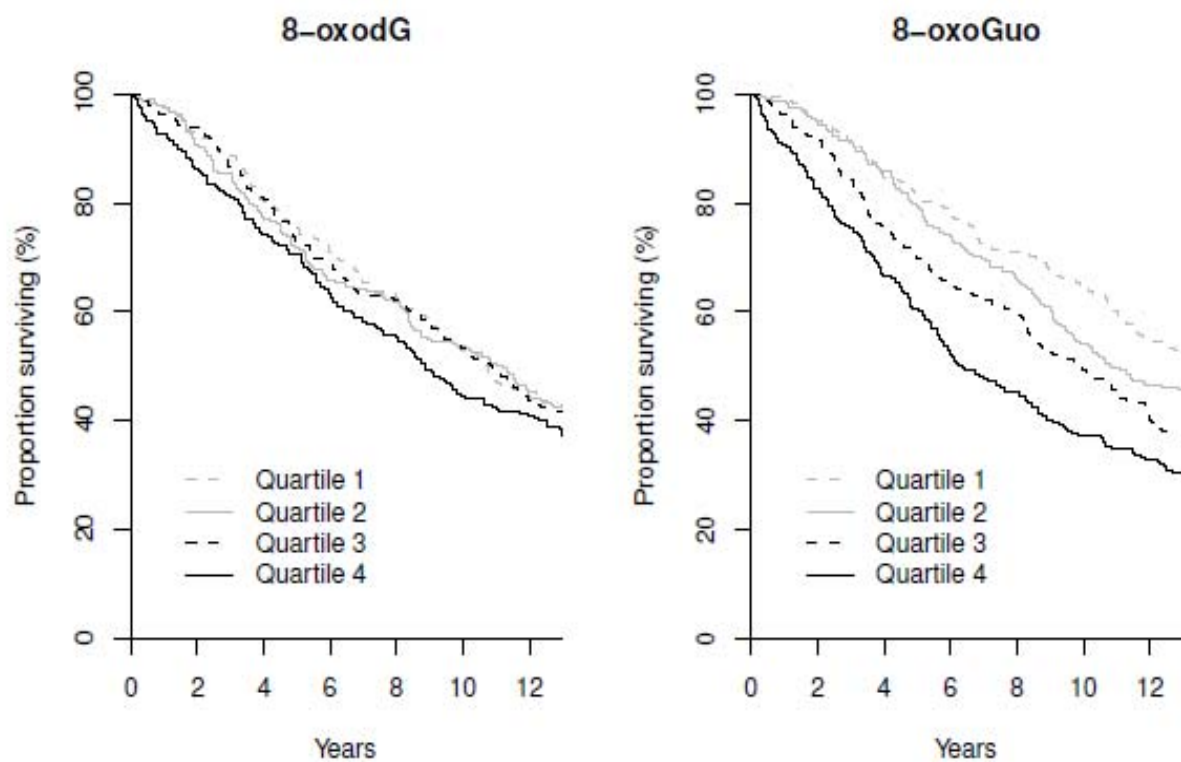

## SUPPLEMENTARY DATA

**Supplementary Figure 2.** ROC curves demonstrating the ability of 8-oxoGuo and other biomarkers to predict mortality.

The AUC for a model including traditional biomarkers in diabetes (without 8-oxoGuo) was 0.63 (95% CI, 0.59–0.67) and for a model including the traditional biomarkers in diabetes and 8-oxoGuo it was 0.67 (95% CI, 0.64–0.72).

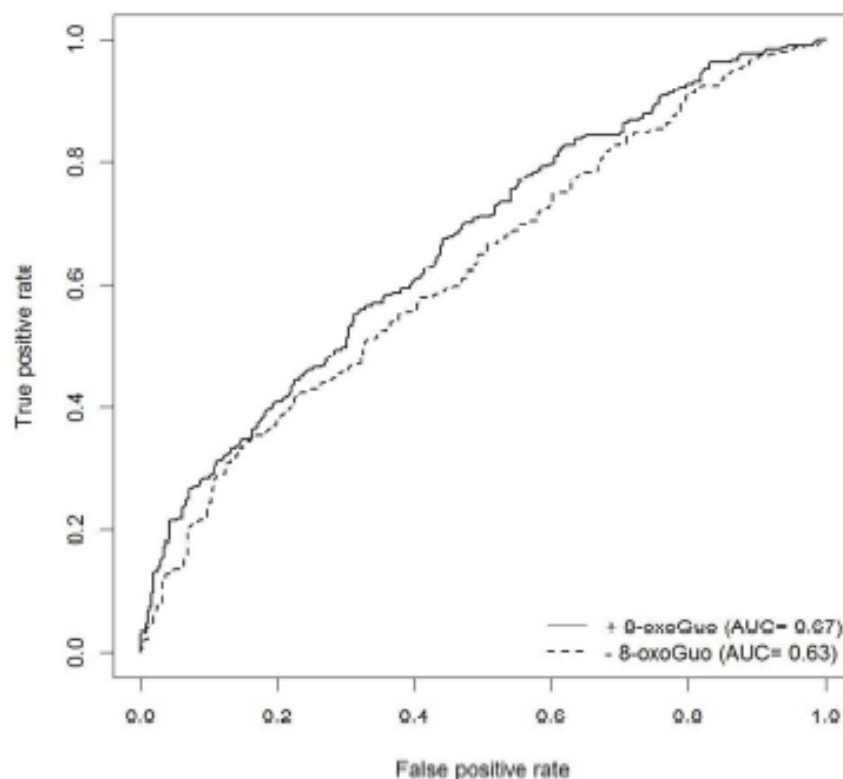

211x211mm (120 x 120 DPI)
